# Supplementary material for: Post-translational flavinylation is associated with diverse extracytosolic redox functionalities throughout bacterial life
Source: eLife. 2021 May 25;10:e66878. doi: 10.7554/eLife.66878 (PMC8238504; doi:10.7554/eLife.66878)
Supplement: Supplementary file 3. [file elife-66878-supp3.xlsx]

## Sheet: Sheet1
	PF00890 + cytochrome + FMN-bind (fused)	PF00890 + cytochrome (fused)	PF00890 + FMN-bind (fused)	PF00890, cytochrome, FMN-bind (unfused)	PF00890, cytochrome (unfused)	PF00890, FMN-bind (unfused)
Number of gene cluster	0	147	2979	22	879	189
Number of genomes	0	108	1236	22	360	171
